# Supplementary material for: Involvement of Taste Receptors in the Oro-Sensory Perception of Nutrients in Rainbow Trout (Oncorhynchus mykiss) Fed Diets with Different Fatty Acid Profiles
Source: Hindawi journal article supplement (doi:10.1155/2022/1152463), 2022-01-31
Supplement: f1 [file 1152463.f1.zip]

**Table 2. Selected amino acid composition (% dry matter)**

| <b>Amino acids (% of dry matter)</b> | <b>Commercial-like</b> | <b>Vegetal V1</b> |
|--------------------------------------|------------------------|-------------------|
| Alanine                              | 2.37                   | 2.22              |
| Arginine                             | 2.44                   | 2.33              |
| Aspartatic acid                      | 3.47                   | 3.11              |
| Cysteine                             | 0.5                    | 0.64              |
| Glutamatic acid                      | 6.97                   | 8.07              |
| Glycine                              | 1.95                   | 1.62              |
| Histidine                            | 0.97                   | 0.95              |
| Isoleucine                           | 1.88                   | 1.93              |
| Leucine                              | 3.56                   | 4.06              |
| Lysine                               | 2.75                   | 2.91              |
| Methionine                           | 0.91                   | 1.09              |
| Phenylalanine                        | 1.97                   | 2.25              |
| Proline                              | 2.26                   | 2.68              |
| Serine                               | 1.83                   | 1.98              |
| Threonine                            | 1.5                    | 1.25              |
| Tryptophane                          | 0.41                   | 0.4               |
| Tyrosine                             | 1.37                   | 1.44              |
| Valine                               | 2.05                   | 1.99              |

| Vegetal V2 |
|------------|
| 2.23       |
| 2.33       |
| 3.11       |
| 0.64       |
| 8.07       |
| 1.62       |
| 0.95       |
| 1.93       |
| 4.06       |
| 2.91       |
| 1.09       |
| 2.25       |
| 2.68       |
| 1.98       |
| 1.25       |
| 0.4        |
| 1.44       |
| 1.99       |
