# Supplementary material for: Involvement of Taste Receptors in the Oro-Sensory Perception of Nutrients in Rainbow Trout (Oncorhynchus mykiss) Fed Diets with Different Fatty Acid Profiles
Source: Hindawi journal article supplement (doi:10.1155/2022/1152463), 2022-01-31
Supplement: f1 [file 1152463.f1.zip]

Archive with 2 entries (2 files):
- supplemental 1 Method self-feeder.pdf
- supplemental 2.pdf
