# Supplementary figures and images for: Involvement of Taste Receptors in the Oro-Sensory Perception of Nutrients in Rainbow Trout (Oncorhynchus mykiss) Fed Diets with Different Fatty Acid Profiles
Source: Hindawi journal article supplement (doi:10.1155/2022/1152463), 2022-01-31

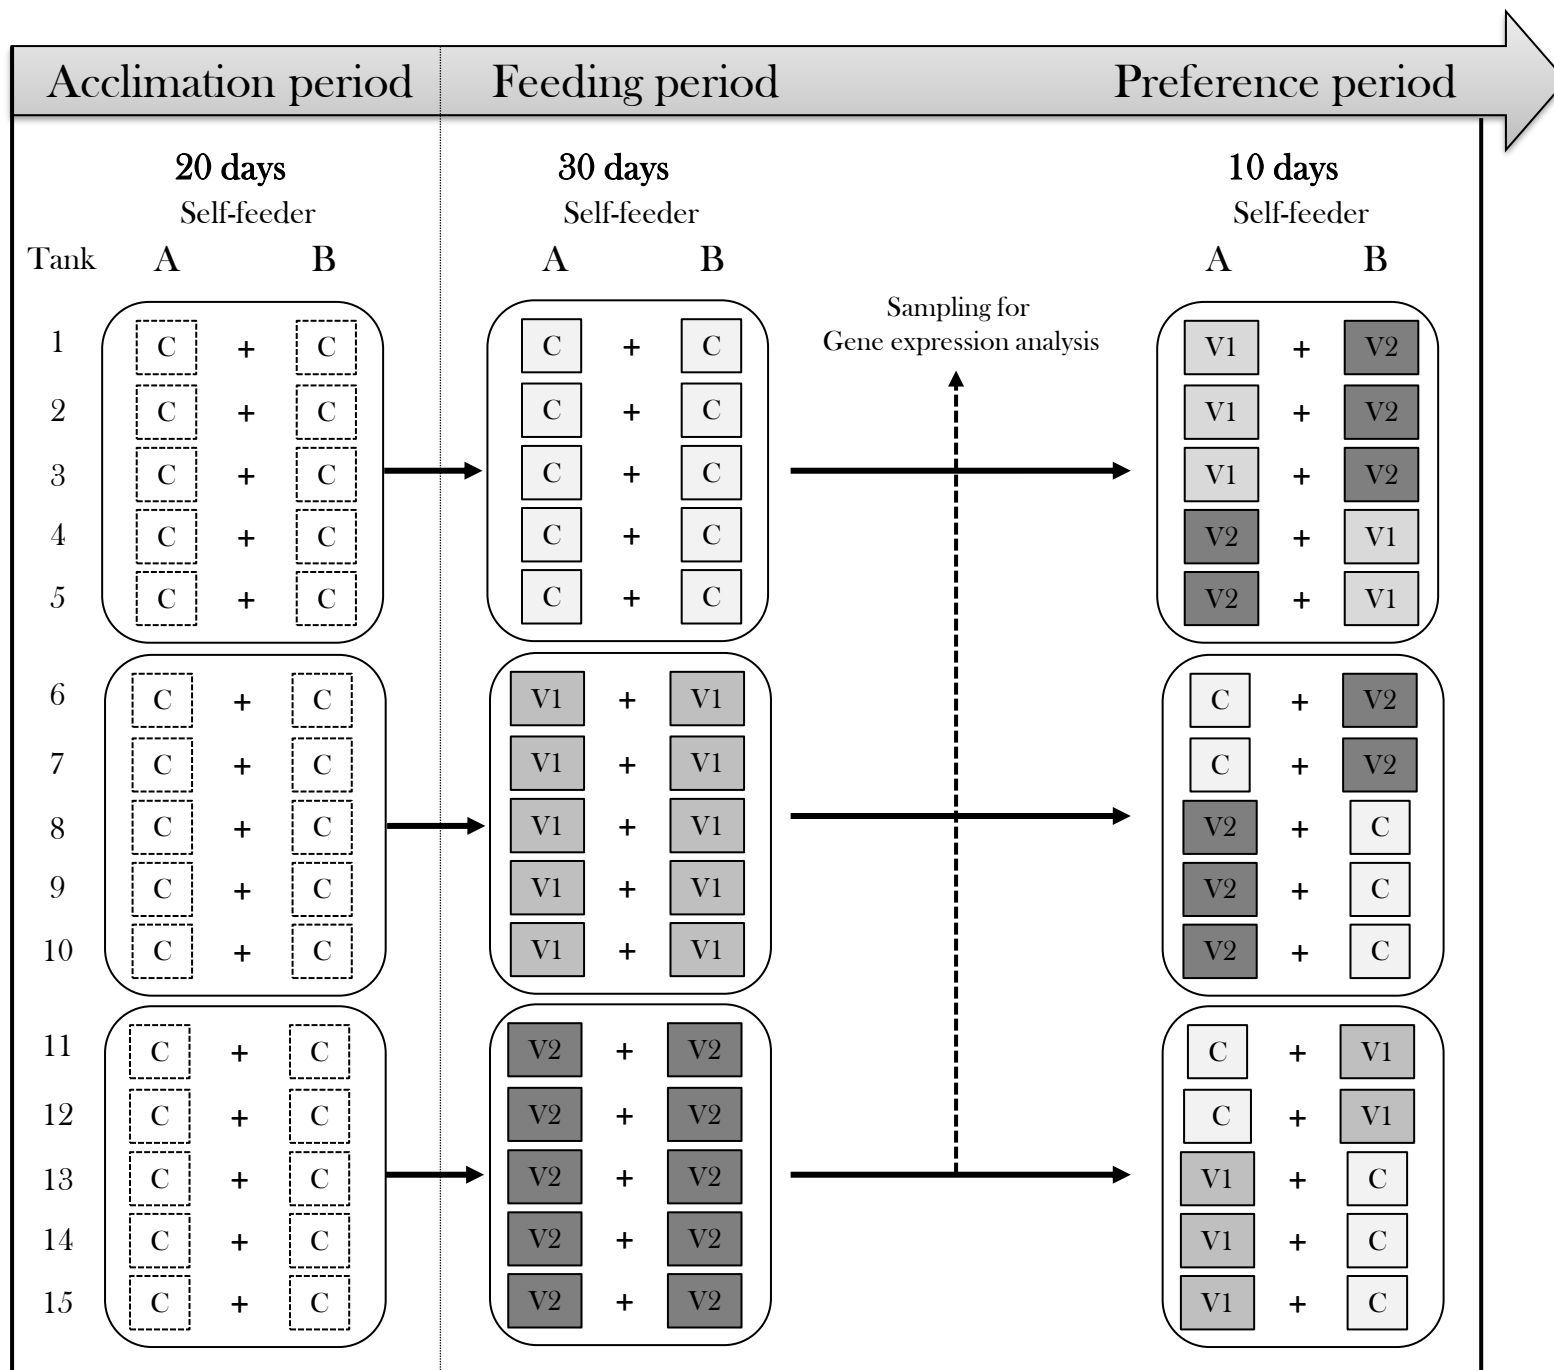

Supplement: f1 [file 1152463.f1.zip]
